## **A Qualitative Study of User Experiences in Harm Reduction Programs**

Olasehinde Ben Adebayo<sup>1</sup>, Teresa Innis<sup>2</sup>

Olasehinde B. Adebayo PhD(c), MPH(c), MEd (HPE)<sup>1</sup>, Teresa Innis MAEd, BA Psych<sup>2</sup>

<sup>1</sup>School of Public Health, University of Saskatchewan, Canada

<sup>2</sup>Executive Director, Nēwo-Yōtina Friendship Centre

**Corresponding Author:** Olasehinde Ben Adebayo; [oba624@usask.ca](mailto:oba624@usask.ca)

This manuscript has been withdrawn following a formal request from the Research Ethics Office of the University of Saskatchewan.
